# Supplementary material
Source: Springer Nature journal article supplement (https://www.springermedizin.de/resource/supplementary/12955_2010_675_MOESM1_ESM.pdf/9561064)

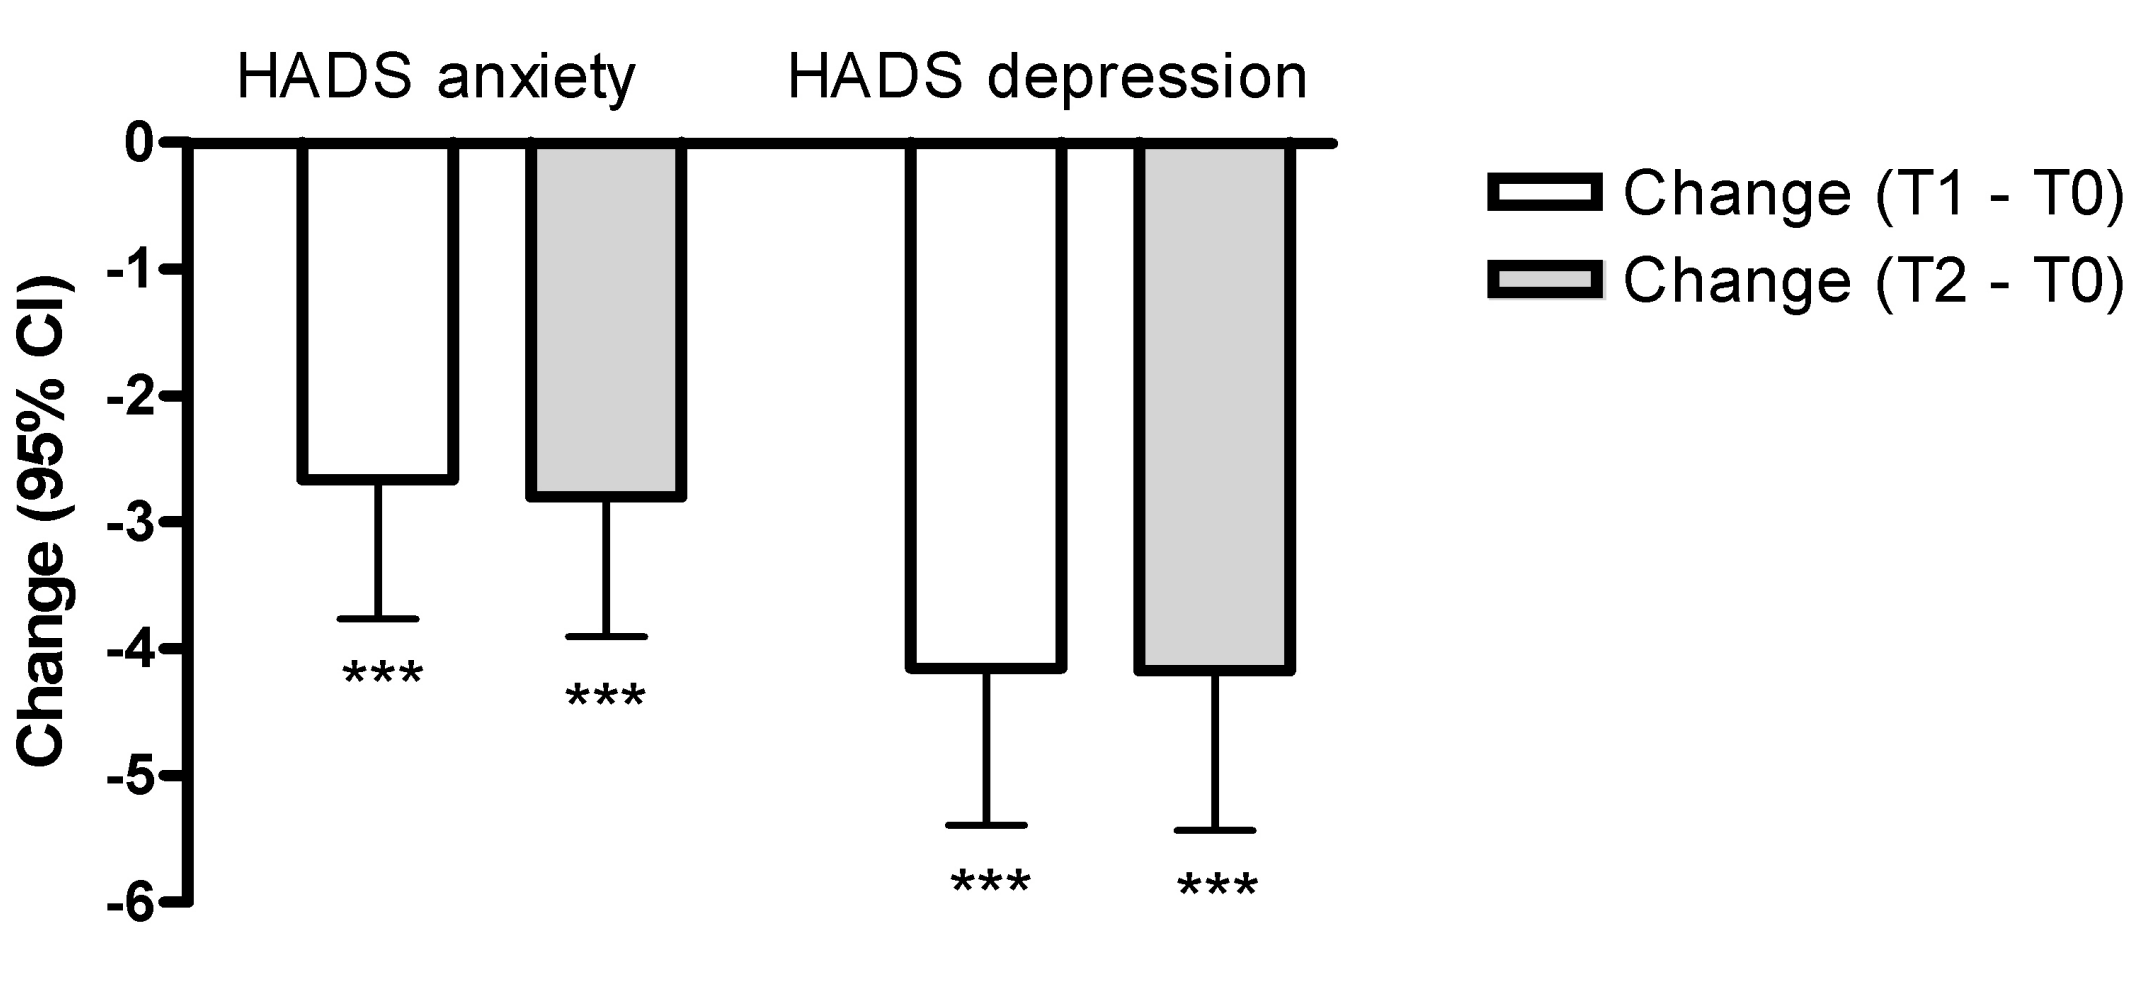

HADS anxiety

HADS depression

Change (95% CI)

0

-1

-2

-3

-4

-5

-6

Change (T1 - T0)

Change (T2 - T0)

\*\*\*

\*\*\*

\*\*\*

\*\*\*

Supplement: MOESM1 [file 9561064]
